# Supplementary material
Source: PubMed Central journal article supplement (PMC4699292)
Supplement: NIHMS746894-supplement-Supplement.pdf [file NIHMS746894-supplement-Supplement.pdf]

### **Author List and Affiliations**

Robert G. Sawyer, MD, Jeffrey A. Claridge, MD, Avery B. Nathens, MD, Ori D. Rotstein, MD, Therese M. Duane, MD, Heather L. Evans, MD, Charles H. Cook, MD, Patrick J. O'Neill, PhD, MD, John E. Mazuski, MD, PhD, Reza Askari, MD, Mark A. Wilson, MD, Lena M. Napolitano, MD, Nicholas Namias, MD, Preston R. Miller, MD, E. Patchen Dellinger, MD, Christopher M. Watson, MD, Raul Coimbra, MD, Daniel L. Dent, MD, Stephen F. Lowry, MD\*, Christine S. Cocanour, MD, Michaela A. West, MD, PhD, Kaysie L. Banton, MD, William G. Cheadle, MD, Pamela A. Lipsett, MD, Christopher A. Guidry, MD, Kimberley Popovsky, BSN

\*Deceased

**Robert G. Sawyer, MD** - University of Virginia; Departments of Surgery and Public Health Sciences

**Jeffrey A. Claridge, MD** - Department of Surgery; MetroHealth Medical Center- Case Western Reserve University

**Avery B. Nathens, MD** - Division of General Surgery; University of Toronto -Sunnybrook Health Sciences Centre

**Ori D. Rotstein, MD** - Department of Surgery; University of Toronto-St. Michael's Hospital

**Therese M. Duane, MD** - Department of Surgery; Virginia Commonwealth University

**Heather L. Evans, MD** - Department of Surgery; University of Washington - Harborview Medical Center

**Charles H. Cook, MD** - Department of Surgery; Beth Israel Deaconess – Harvard Medical School

**Patrick J. O'Neill, PhD, MD** - Department of Surgery; Maricopa Integrated Health System

**John E. Mazuski, MD, PhD** - Department of Surgery; Washington University School of Medicine

**Reza Askari, MD** - Department of Surgery Brigham and Women's Hospital-Harvard Medical School

**Mark A. Wilson, MD** – Department of Surgery; VA Pittsburgh Healthcare System

**Lena M. Napolitano, MD** - Department of Surgery; University of Michigan Health Systems

**Nicholas Namias, MD** - Department of Surgery; University of Miami Health System

**Preston R. Miller, MD** - Department of Surgery; Wake Forest-Baptist Health

**E. Patchen Dellinger, MD** - Department of Surgery - University of Washington

**Christopher M. Watson, MD** - Department of Surgery Palmetto Heath Richland- University of South Carolina

**Raul Coimbra, MD** - Department of Surgery; University of California San Diego

**Daniel L. Dent, MD** - Department of Surgery; University of Texas Health Science Center San Antonio

**Stephen F. Lowry, MD\*** - Department of Surgery; University of Medicine and Dentistry of New Jersey-Robert Wood Johnson Medical School

**Christine S. Cocanour, MD** - Department of Surgery University of California Davis

**Michaela A. West, MD, PhD** - Department of Surgery; University of California San Francisco

**Kaysie L. Banton, MD** - Department of Surgery; University of Minnesota

**William G. Cheadle, MD** - Department of Surgery; University of Louisville School of Medicine-VA Medical Center

**Pamela A. Lipsett, MD** - Departments of Surgery, Anesthesiology, Critical Care Medicine, and Nursing; The Johns Hopkins University Schools of Medicine and Nursing.

**Christopher A. Guidry, MD** - Department of Surgery; University of Virginia

**Kimberley Popovsky, BSN** - Department of Surgery; University of Virginia

### **Author Roles**

Primary investigator: RGS

Author of initial manuscript draft: RGS

Data Collection and Individual Site Coordinators: RGS, JAC, ABN, ODR, TMD, HLE, CHC, PJO, JEM, RA, LMN, NN, PRM, EPD, CMW, RC, DLD, SFL, CSC, MAW, KLB, WGC, PAL, & KP.

Statistical Analysis and Interpretation: RGS & CAG

Review and editing of manuscript for important intellectual content: All Authors

### **Oversight**

The full protocol was initially approved by the University of Virginia Institutional Review Board (IRB), the Data and Safety Monitoring Board, and the assigned National Institute of Health Program Officer (Sara Dunsmore, PhD). Local IRB approval was required prior to initiation of the study at the individual sites. The independent four person data safety and monitoring board (Chair: Andrew F. Shorr, MD, Washington, DC; William D. Dupont, PhD, Nashville, TN; Kevin P. High, MD, Winston-Salem, NC; John C. Magee, MD, Ann Arbor, MI) reviewed the initial protocol, six-monthly cumulative safety data, a midpoint interim analysis, and the final data and manuscript, granting approval for continuation at each step. The first author wrote the first and subsequent drafts of the manuscript with approval of the local investigators. All the authors of the paper vouch for the accuracy of the data and confirm that the contents of the article adhere to the specifications of the protocol.

Table S1. Baseline Patient and Index Infection Characteristics

| <u>Demographics and Comorbidities</u>              | Control Group<br>(N=260) | Experimental Group<br>(N=258) |
|----------------------------------------------------|--------------------------|-------------------------------|
| Age - yr                                           | 52.2 ± 1.0               | 52.2 ± 1.0                    |
| Male sex - no. (%)                                 | 145 (55.8)               | 144 (55.8)                    |
| Race - no. (%) <sup>†</sup>                        |                          |                               |
| White                                              | 208 (80.0)               | 196 (76.0)                    |
| Black                                              | 43 (16.5)                | 51 (19.8)                     |
| Asian                                              | 5 (1.9)                  | 6 (2.3)                       |
| American Indian/ Alaskan Native                    | 2 (0.8)                  | 1 (0.4)                       |
| Other                                              | 2 (0.8)                  | 4 (1.6)                       |
| Hispanic - no. (%) <sup>†</sup>                    | 20 (7.8)                 | 15 (5.8)                      |
| Body mass index (kg/m <sup>2</sup> )               | 28.4 ± 0.5               | 29.5 ± 0.6                    |
| <u>Classification of index infection - no. (%)</u> |                          |                               |
| Community-acquired                                 | 166 (63.8)               | 155 (60.0)                    |
| Healthcare-associated                              | 94 (36.2)                | 102 (40.0)                    |
| Hospital-acquired                                  | 31 (11.9)                | 38 (14.7)                     |
| Prior red cell transfusion - no. (%)               | 22 (8.5)                 | 21 (8.1)                      |
| Any major medical co-morbidity - no. (%)           | 135 (51.9)               | 144 (55.8)                    |
| <u>Medical history - no. (%)</u>                   |                          |                               |
| Diabetes mellitus                                  | 41 (15.8)                | 37 (14.3)                     |
| Cardiac disease                                    | 37 (14.2)                | 33 (12.8)                     |
| Malignancy                                         | 28 (10.8)                | 31 (12.0)                     |
| Inflammatory bowel disease                         | 24 (9.2)                 | 29 (11.2)                     |
| Pulmonary disease                                  | 23 (8.8)                 | 29 (11.2)                     |
| Chronic corticosteroid use                         | 16 (6.2)                 | 15 (5.8)                      |
| Cerebrovascular disease                            | 12 (4.6)                 | 7 (2.7)                       |
| Peripheral vascular disease                        | 10 (3.8)                 | 16 (6.2)                      |
| Cirrhosis                                          | 10 (3.8)                 | 7 (2.7)                       |
| <u>Characteristics of Index Infection</u>          |                          |                               |
| APACHE II score                                    | 9.9 ± 0.4                | 10.3 ± 0.4                    |
| Maximum white blood cell count - k/ml              | 15.6 ± 0.4               | 17.1 ± 0.7                    |
| Maximum temperature - °C                           | 37.8 ± 0.1               | 37.7 ± 0.1                    |
| <u>Organ of origin - no. (%)</u>                   |                          |                               |
| Colon or rectum                                    | 80 (30.8)                | 97 (37.6)                     |
| Appendix                                           | 34 (13.3)                | 39 (15.1)                     |
| Small bowel                                        | 31 (11.9)                | 42 (16.3)                     |
| Biliary tree including gall bladder                | 31 (11.9)                | 25 (9.7)                      |

|                                             |            |            |
|---------------------------------------------|------------|------------|
| Stomach                                     | 20 (7.7)   | 11 (4.3)   |
| Liver                                       | 13 (5.0)   | 5 (1.9)    |
| Pancreas                                    | 12 (4.6)   | 4 (1.6)    |
| Duodenum                                    | 9 (3.5)    | 14 (5.4)   |
| Abdominal wall                              | 5 (1.9)    | 8 (3.1)    |
| Esophagus                                   | 2 (0.8)    | 1 (0.4)    |
| Other/multiple/unknown                      | 23 (8.8)   | 11 (4.3)   |
| Source control procedure – no. (%)          |            |            |
| Percutaneous drainage                       | 86 (33.1)  | 86 (33.3)  |
| Resection and anastomosis or closure        | 69 (26.5)  | 64 (24.8)  |
| Surgical drainage only                      | 55 (21.1)  | 54 (20.9)  |
| Resection and proximal diversion            | 27 (10.4)  | 37 (14.3)  |
| Simple closure                              | 20 (7.7)   | 12 (4.7)   |
| Surgical drainage and diversion             | 3 (1.2)    | 4 (1.6)    |
| Management of wound – no. (%)               |            |            |
| Primary closure                             | 87 (33.5)  | 72 (27.9)  |
| None (percutaneous drainage)                | 86 (33.1)  | 86 (33.3)  |
| Secondary intention                         | 47 (18.1)  | 51 (19.8)  |
| Delayed primary closure                     | 24 (9.2)   | 32 (12.4)  |
| Close port sites only                       | 16 (6.2)   | 16 (6.2)   |
| Most commonly isolated pathogens – no. (%)  |            |            |
| <i>Escherichia coli</i>                     | 46 (17.7)  | 33 (12.8)  |
| <i>Streptococcus</i> species                | 42 (16.2)  | 37 (14.3)  |
| <i>Bacteroides</i> species                  | 29 (11.2)  | 40 (15.5)  |
| <i>Enterococcus</i> species                 | 29 (11.2)  | 23 (8.9)   |
| <i>Candida albicans</i>                     | 23 (11.2)  | 18 (7.0)   |
| No culture obtained                         | 56 (21.5)  | 51 (19.8)  |
| Most commonly used antimicrobials – no. (%) |            |            |
| Piperacillin-tazobactam                     | 144 (55.4) | 139 (53.9) |
| Metronidazole                               | 83 (31.9)  | 80 (31.0)  |
| Ciprofloxacin                               | 73 (28.1)  | 68 (26.4)  |
| Vancomycin                                  | 57 (21.9)  | 74 (28.7)  |
| Fluconazole                                 | 40 (15.4)  | 36 (14.0)  |
| Ertapenem                                   | 29 (11.2)  | 24 (9.3)   |

\* Values listed are Mean ± SEM or No. (%).

† Race and ethnicity were designated by the subject or surrogate.

No differences between groups were significant at the p <0.05 level.

Table S2. Outcomes in key subgroups.

| Subgroup               | No. | Days of antimicrobials Median/IQR | Surgical site infections no. (%) | Recurrent intra-abdominal infections no. (%) | Deaths no. (%) | Surgical site infection, recurrent intra-abdominal infection, or death no. (%) | Difference for composite outcome $p^{\ddagger}$ |
|------------------------|-----|-----------------------------------|----------------------------------|----------------------------------------------|----------------|--------------------------------------------------------------------------------|-------------------------------------------------|
| Protocol fulfilled     |     |                                   |                                  |                                              |                |                                                                                |                                                 |
| Control                | 189 | 7 (5-10)*                         | 16 (8.5%)                        | 18 (9.5%)                                    | 1 (0.5%)       | 33 (17.5%)                                                                     |                                                 |
| Experimental           | 211 | 4 (4-5)                           | 14 (6.7%)                        | 24 (11.4%)                                   | 2 (1.0%)       | 37 (17.6%)                                                                     | 0.97                                            |
| Protocol not fulfilled |     |                                   |                                  |                                              |                |                                                                                |                                                 |
| Control                | 71  | 11 (7-17)                         | 7 (9.9%)                         | 18 (25.4%)                                   | 1 (1.4%)       | 25 (35.2%)                                                                     |                                                 |
| Experimental           | 47  | 11 (8-19)                         | 3 (6.4%)                         | 16 (34.0%)                                   | 1 (2.1%)       | 18 (38.3%)                                                                     | 0.88                                            |
| APACHE II $\geq$ 10    |     |                                   |                                  |                                              |                |                                                                                |                                                 |
| Control                | 120 | 8 (5-10)*                         | 14 (11.7%)                       | 23 (19.2%)                                   | 1 (0.8%)       | 36 (30.0%)                                                                     |                                                 |
| Experimental           | 122 | 4 (4-5)                           | 7 (5.7%)                         | 20 (16.4%)                                   | 2 (1.6%)       | 27 (22.1%)                                                                     | 0.21                                            |
| Healthcare-associated  |     |                                   |                                  |                                              |                |                                                                                |                                                 |
| Control                | 94  | 8 (5-10)*                         | 9 (9.6%)                         | 14 (14.9%)                                   | 0 (0.0%)       | 22 (23.4%)                                                                     |                                                 |
| Experimental           | 102 | 4 (4-5)                           | 6 (5.9%)                         | 17 (16.7%)                                   | 2 (2.0%)       | 23 (22.5%)                                                                     | 0.87                                            |
| Percutaneous drainage  |     |                                   |                                  |                                              |                |                                                                                |                                                 |
| Control                | 86  | 8 (5-10)*                         | -                                | 14 (16.3%)                                   | 0 (0.0%)       | 14 (16.3%)                                                                     |                                                 |
| Experimental           | 86  | 4 (4-5)                           | -                                | 14 (16.3%)                                   | 0 (0.0%)       | 14 (16.3%)                                                                     | 1.0                                             |
| Surgical drainage      |     |                                   |                                  |                                              |                |                                                                                |                                                 |
| Control                | 174 | 8 (5-10)*                         | 23 (13.2%)                       | 22 (12.6%)                                   | 2 (1.1%)       | 44 (25.3%)                                                                     |                                                 |
| Experimental           | 171 | 4 (4-5)                           | 17 (9.9%)                        | 26 (15.2%)                                   | 3 (1.8)        | 41 (24.0%)                                                                     | 0.87                                            |
| Appendiceal source     |     |                                   |                                  |                                              |                |                                                                                |                                                 |

|                               |     |           |              |               |             |               |      |
|-------------------------------|-----|-----------|--------------|---------------|-------------|---------------|------|
| Control                       | 34  | 8 (5-10)† | 1 (2.9%)     | 6 (17.6%)     | 0<br>(0.0%) | 7 (20.6%)     |      |
| Experimental                  | 39  | 5 (4-6)   | 2 (5.1%)     | 7 (17.9%)     | 0<br>(0.0%) | 9 (23.1%)     | 0.80 |
| Non-<br>appendiceal<br>source |     |           |              |               |             |               |      |
| Control                       | 226 | 8 (5-10)* | 22<br>(9.7%) | 30<br>(13.3%) | 2<br>(0.9%) | 51<br>(22.6%) |      |
| Experimental                  | 218 | 4 (4-5)   | 15<br>(6.9%) | 33<br>(15.1%) | 3<br>(1.4%) | 46<br>(21.1%) | 0.80 |

\* p <0.01 for difference between clinical response and four day groups by Wilcoxon test

† p <0.05 for difference between clinical response and four day groups by Wilcoxon test

‡ Difference between clinical response and four day groups by Chi-square test with Yates' correction

None of the individual outcomes were different between groups at the 0.05 significance level

Table S3. Logistic regression analysis of predictors of the primary composite outcome.

| Variable                                                | Wald Chi-square | Odds Ratio*      | P Value |
|---------------------------------------------------------|-----------------|------------------|---------|
| Experimental group versus control group                 | 0.049           | 0.95 (0.63-1.45) | 0.82    |
| Age in years                                            | 1.12            | 0.99 (0.98-1.01) | 0.29    |
| Female versus male                                      | 0.021           | 0.97 (0.63-1.49) | 0.86    |
| APACHEII per point                                      | 6.68            | 1.05 (1.01-1.09) | 0.0098  |
| Percutaneous drainage versus surgical drainage          | 1.98            | 0.69 (0.42-1.15) | 0.16    |
| Site = appendix versus non-appendix                     | 0.026           | 1.05 (0.57-1.96) | 0.87    |
| Healthcare-acquired versus community-acquired infection | 1.07            | 0.75 (0.43-1.30) | 0.30    |

\* Odds ratio with 95% confidence interval

C-statistic = 0.603, Hosmer-Lemeshow goodness-of-fit test = 0.729
